# Supplementary material
Source: HighWire-hosted journal article supplement (http://molpharm.aspetjournals.org/highwire/filestream/77300/field_highwire_adjunct_files/0/93179_2014-06-15_supplementary_info.pdf)

**Subtype-Specific Mechanisms for Functional Interaction between  $\alpha 6\beta 4^*$  Nicotinic Acetylcholine Receptors and P2X Receptors**

Walrati Limapichat, Dennis A. Dougherty, Henry A. Lester

*Molecular Pharmacology* 2014

SUPPLEMENTAL INFORMATION

**Supplemental Table 1.** ACh and ATP EC<sub>50</sub> values from oocytes expressing combinations of  $\alpha 6\beta 4^*$  nAChR and P2X receptors.

| Receptor(s)                                                | Dose-response | Additional Agonist    | EC <sub>50</sub> | Hill Constant   | <i>n</i> |
|------------------------------------------------------------|---------------|-----------------------|------------------|-----------------|----------|
|                                                            |               |                       | $\mu\text{M}$    |                 |          |
| $\alpha 6(\text{L9'S})\beta 4$                             | ACh           |                       | $3.3 \pm 0.11$   | $1.4 \pm 0.05$  | 8        |
| $\alpha 6\beta 4\beta 3(\text{V13'S})$                     | ACh           |                       | $1.3 \pm 0.06$   | $0.84 \pm 0.03$ | 10       |
| P2X2                                                       | ATP           |                       | $24 \pm 1.2$     | $1.5 \pm 0.10$  | 18       |
| $\alpha 6(\text{L9'S})\beta 4 + \text{P2X2}$               | ACh           |                       | $4.3 \pm 0.10$   | $1.3 \pm 0.03$  | 11       |
|                                                            | ACh           | 32 $\mu\text{M}$ ATP  | $4.5 \pm 0.26$   | $1.4 \pm 0.09$  | 14       |
|                                                            | ACh           | 100 $\mu\text{M}$ ATP | $6.0 \pm 0.82$   | $1.5 \pm 0.23$  | 14       |
|                                                            | ATP           |                       | $22 \pm 1.1$     | $1.6 \pm 0.11$  | 11       |
|                                                            | ATP           | 100 $\mu\text{M}$ ACh | $33 \pm 3.6$     | $1.3 \pm 0.15$  | 11       |
| $\alpha 6\beta 4\beta 3(\text{V13'S}) + \text{P2X2}$       | ACh           |                       | $1.6 \pm 0.09$   | $0.84 \pm 0.03$ | 12       |
|                                                            | ACh           | 32 $\mu\text{M}$ ATP  | $2.4 \pm 1.1$    | $0.75 \pm 0.18$ | 19       |
|                                                            | ACh           | 100 $\mu\text{M}$ ATP | $1.6 \pm 0.45$   | $0.67 \pm 0.09$ | 8        |
|                                                            | ATP           |                       | $23 \pm 1.7$     | $1.6 \pm 0.15$  | 11       |
|                                                            | ATP           | 100 $\mu\text{M}$ ACh | $24 \pm 3.1$     | $1.8 \pm 0.35$  | 12       |
| P2X3(K65A)                                                 | ATP           |                       | $13.6 \pm 1.3$   | $1.4 \pm 0.16$  | 12       |
| $\alpha 6(\text{L9'S})\beta 4 + \text{P2X3(K65A)}$         | ACh           |                       | $3.3 \pm 0.13$   | $1.3 \pm 0.06$  | 8        |
|                                                            | ATP           |                       | $37.8 \pm 6.1$   | $0.94 \pm 0.11$ | 14       |
|                                                            | ATP           | 100 $\mu\text{M}$ ACh | $32.8 \pm 5.0$   | $1.0 \pm 0.12$  | 11       |
| $\alpha 6\beta 4\beta 3(\text{V13'S}) + \text{P2X3(K65A)}$ | ACh           |                       | $1.1 \pm 0.10$   | $0.84 \pm 0.05$ | 7        |
|                                                            | ATP           |                       | $7.6 \pm 0.33$   | $1.6 \pm 0.09$  | 11       |
|                                                            | ATP           | 100 $\mu\text{M}$ ACh | $11.5 \pm 1.6$   | $1.3 \pm 0.21$  | 12       |
| P2X2(T18A)                                                 | ATP           |                       | $24.1 \pm 4.8$   | $1.0 \pm 0.15$  | 11       |
| $\alpha 6(\text{L9'S})\beta 4 + \text{P2X2(T18A)}$         | ATP           |                       | $22.9 \pm 2.7$   | $1.1 \pm 0.12$  | 11       |
| P2X3TR                                                     | ATP           |                       | $9.73 \pm 0.29$  | $1.5 \pm 0.06$  | 6        |
| $\alpha 6(\text{L9'S})\beta 4 + \text{P2X3TR}$             | ATP           |                       | $20.1 \pm 5.3$   | $0.97 \pm 0.20$ | 7        |
|                                                            | ATP           | 100 $\mu\text{M}$ ACh | $39.0 \pm 6.5$   | $1.0 \pm 0.13$  | 8        |

## LEGENDS TO SUPPLEMENTAL FIGURES

*Supplemental Figure 1. nAChR alone is not activated or modulated by ATP, and P2X receptor alone is not activated or modulated by ACh.*

(a) Mean normalized ACh (100  $\mu$ M), ATP (1 mM), and ACh+ATP currents  $\pm$  s.e.m. from oocytes injected with P2X2,  $\alpha 6\beta 4$ , or  $\alpha 6\beta 4\beta 3$  ( $n = 6, 8$ , and  $14$ , respectively). (b) Mean normalized ACh (100  $\mu$ M), ATP (100  $\mu$ M), and ATP\* currents from oocytes injected with P2X3 ( $n = 10$ ).

*Supplemental Figure 2.*

Mean normalized agonist-induced currents  $\pm$  s.e.m. are shown for P2X2- $\alpha 6\beta 4$  oocytes ( $n = 12$ ) upon receptor activation by ACh (100  $\mu$ M), ATP (1 mM), ACh+ATP, ATP (1 mM), and then ACh (100  $\mu$ M), respectively. The arrow indicates sequential agonist application. All measured current signals were normalized to the current evoked by ACh+ATP of the same cell and then averaged. The data highlight that  $1^{\text{st}} I_{\text{ATP}} > 2^{\text{nd}} I_{\text{ATP}}$  while  $1^{\text{st}} I_{\text{ACh}} \approx 2^{\text{nd}} I_{\text{ACh}}$ .

*Supplemental Figure 3. A P2X2 desensitized state may play a role in P2X2- $\alpha 6\beta 4$  cross inhibition.*

Representative current traces from oocyte expressing P2X2 only (*left*) and oocyte co-expressing  $\alpha 6\beta 4$  and P2X2 (*right*) upon application of 1 mM ATP. P2X2 oocyte shows minimal desensitization whereas P2X2- $\alpha 6\beta 4$  oocyte showed  $\sim 20\%$  desensitization.

***Supplemental Figure 4. Validation of the “prolonged plus brief pulse” protocol, showing functional interaction between P2X2(T18A) and  $\alpha 6\beta 4$  receptors.***

(a) Mean, normalized agonist-induced current  $\pm$  s.e.m. from P2X2(T18A)– $\alpha 6\beta 4$  oocytes ( $n = 10$ ) upon application of ACh (100  $\mu$ M), ATP (1 mM), and ATP with ACh pre-application (ATP\*). Cross inhibition was observed between P2X2(T18A) and  $\alpha 6\beta 4$  at 1mM ATP. All current signals were normalized to the ATP current of the same cell and then averaged.  $\Delta^*$  is the difference between  $I_{ATP}$  and  $I_{ATP^*}$ . \*\*\*,  $p < 0.0005$ . The waveforms resembled those of Figure 4a, inset.

(b) ATP dose-response relations for P2X2(T18A) oocytes ( $EC_{50} 24.1 \pm 4.8 \mu$ M, Hill constant  $1.0 \pm 0.15$ ,  $n = 11$ ), and P2X2(T18A)– $\alpha 6\beta 4$  oocytes ( $EC_{50} 22.9 \pm 2.7 \mu$ M, Hill constant  $1.1 \pm 0.12$ ,  $n = 11$ ). The curve fit for wild-type P2X2 oocytes is shown in grey ( $EC_{50} 23.9 \pm 1.5 \mu$ M, Hill constant  $1.5 \pm 0.10$ ,  $n = 18$ ) as a reference, omitting the data points for clarity. The P2X2(T18A) receptor produced an ATP dose-response relation that is similar to the wild-type P2X2 receptor, despite very different desensitizing kinetics. See Supplemental Table 1.

***Supplemental Figure 5. Co-injecting P2X2 and P2X3 into Xenopus oocytes produced heteromeric P2X2/3 receptor expression, and P2X2/3 current could be studied using  $\alpha \beta$ meATP as an agonist.***

(a) Representative agonist-induced currents from an oocyte expressing P2X2 alone when ATP or  $\alpha \beta$ meATP was applied.  $\alpha \beta$ meATP at 100  $\mu$ M did not activate P2X2.

(b) Representative agonist-induced current from an oocyte expressing P2X3 alone, showing fast opening and closing kinetics with both ATP and  $\alpha\beta\text{meATP}$  activation.

(c) Representative agonist-induced currents from oocytes injected with P2X2 and P2X3 mRNA at three different ratios. Heteromeric P2X2/3 receptor was activated by  $\alpha\beta\text{meATP}$  and showed different kinetics from homomeric P2X3 channel. At 1:325 and 1:50 P2X2:P2X3 injection ratios, a mixed waveform from P2X3 and P2X2/3 receptors was observed. At 1:10 ratio, the waveform from P2X2/3 predominates. Therefore, the 1:10 P2X2:P2X3 was the mRNA ratio being used throughout this work.

(d) Mean normalized ACh,  $\alpha\beta\text{meATP}$ , and ACh+ $\alpha\beta\text{meATP}$  currents from oocytes injected with 1:10 P2X2:P2X3 ( $n = 7$ ). P2X2/3 receptor was not activated or modulated by ACh.

***Supplemental Figure 6. The role of the nAChR  $\beta 3$  subunit in cross inhibition***

$\alpha 6\beta 4$ -containing nAChR and (a) P2X2 or P2X2TR receptors, (b) P2X3 or P2X2(T18A) receptors, and (c) P2X2/3 receptors.

***Supplemental Figure 7. Mec blocks  $\alpha 6\beta 4$  and  $\alpha 6\beta 4\beta 3$  in a voltage-dependent fashion.***

(a) Mec dose-response relations recorded from oocytes expressing  $\alpha 6\beta 4$  or  $\alpha 6\beta 4\beta 3$  at  $-60$  mV as the receptor was activated by  $100\ \mu\text{M}$  ACh.

(b–c) Representative current traces from voltage jump experiments on an oocyte expressing  $\alpha 6\beta 4$  (b) or  $\alpha 6\beta 4\beta 3$  (c). Cells were clamped at  $-60$  mV. Current was recorded in the presence of  $100\ \mu\text{M}$

ACh +/- Mec at specified concentration. The voltage was stepped in -20 mV increment from +70 mV to -110 mV. Fraction of Mec block was calculated for each cell and then normalized.

*Supplemental Figure 8. Results from control experiments for data presented in Figure 7b and 7d.*

Mean normalized currents  $\pm$  s.e.m. are shown for agonist-induced currents measured from P2X2- $\alpha 6\beta 4$  oocytes ( $n = 7$ ) or P2X2- $\alpha 6\beta 4\beta 3$  oocytes ( $n = 8$ ) in response to ACh (100  $\mu$ M), ATP (1 mM), and 2 repeating doses of ACh+ATP mixture in the order indicated by the arrows. The first and second ACh + ATP applications produced comparable current responses.

Supplemental Figure 1

a.

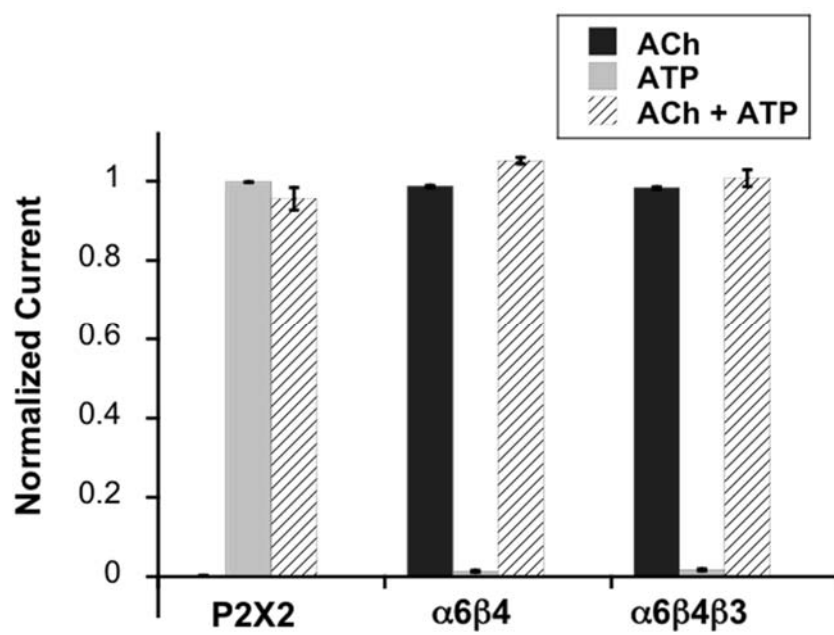

b.

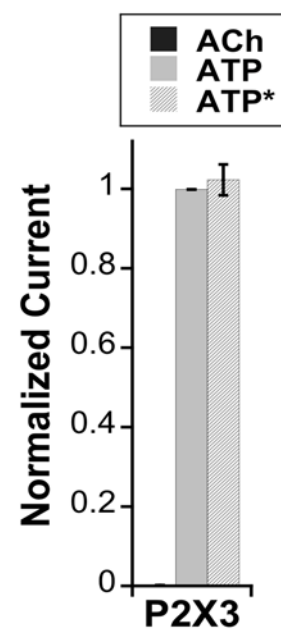

Supplemental Figure 2

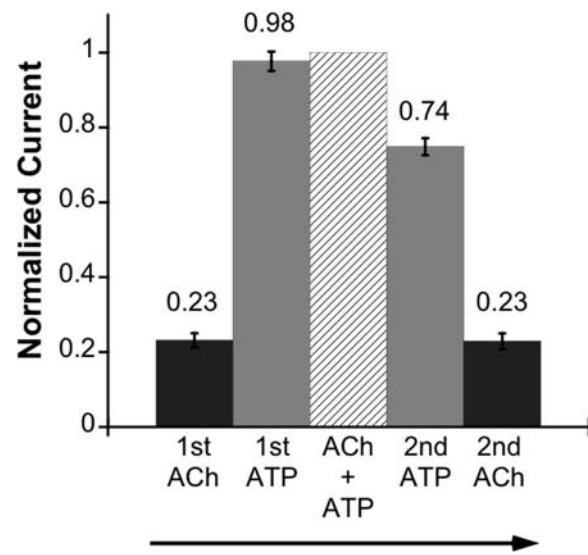

Supplemental Figure 3

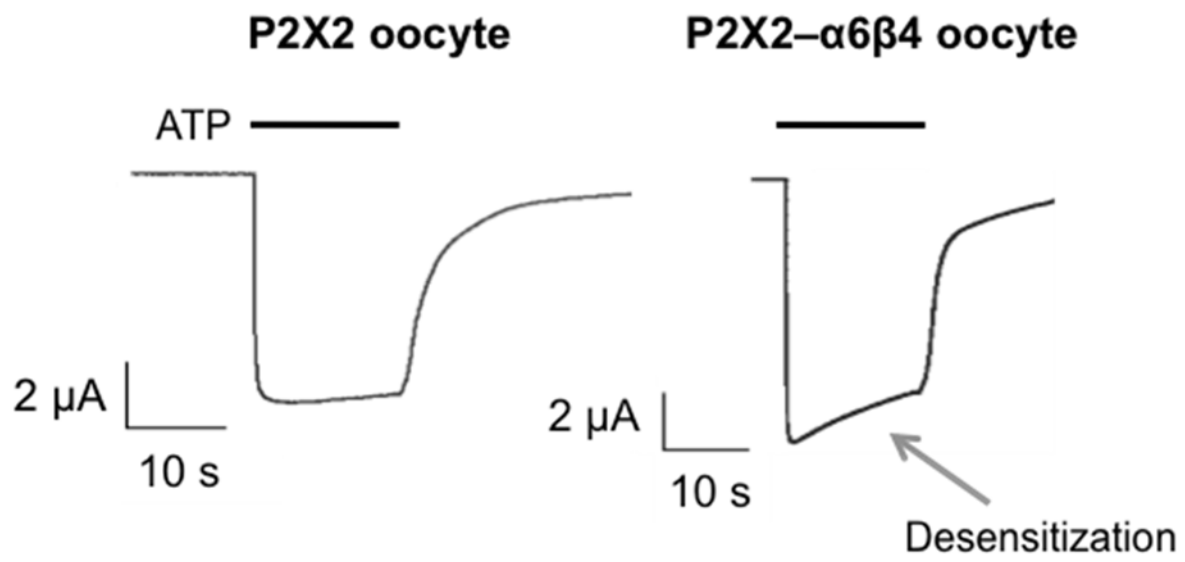

Supplemental Figure 4

a.

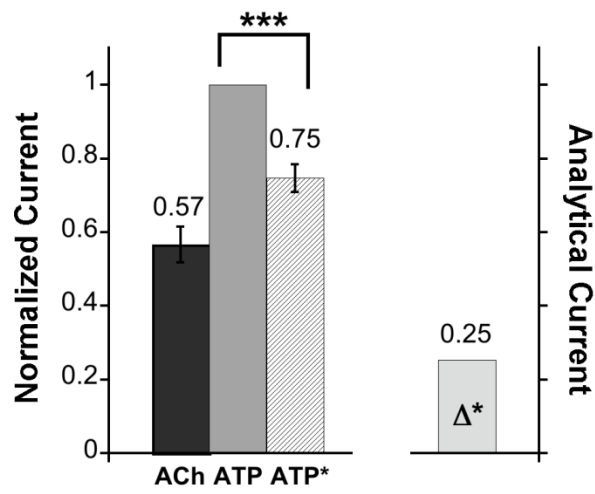

b.

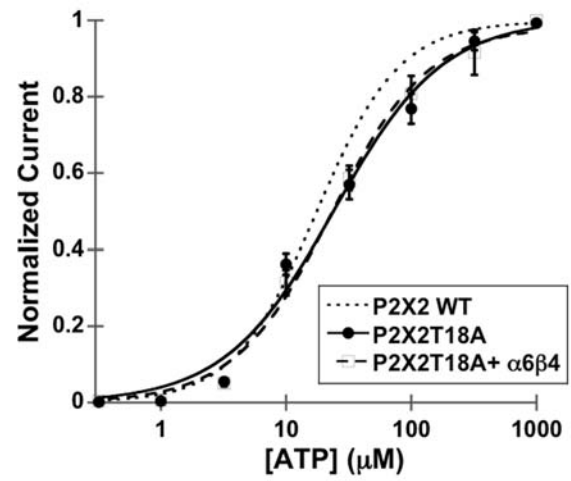

Supplemental Figure 5

a.

b.

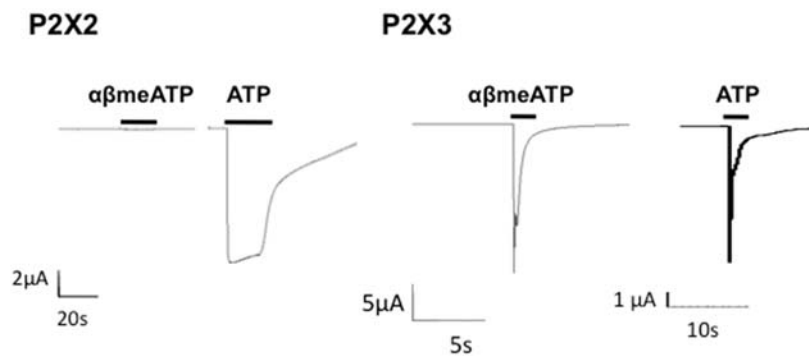

c.

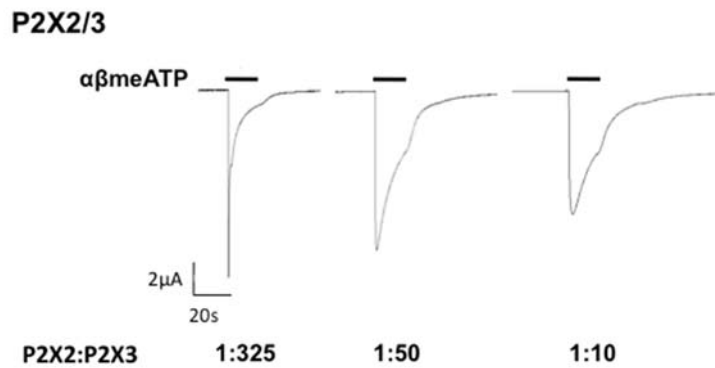

d.

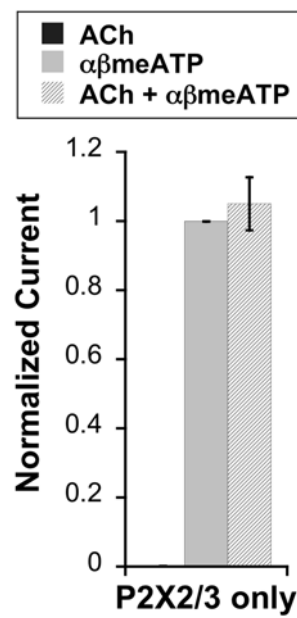

Supplemental Figure 6

a.

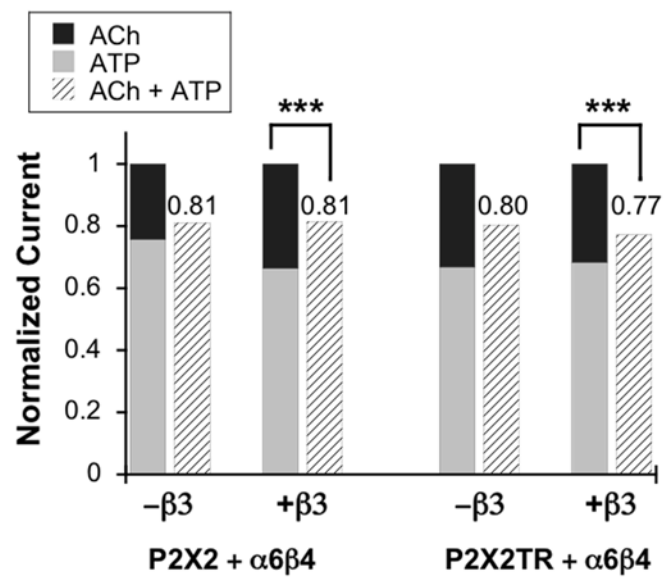

b.

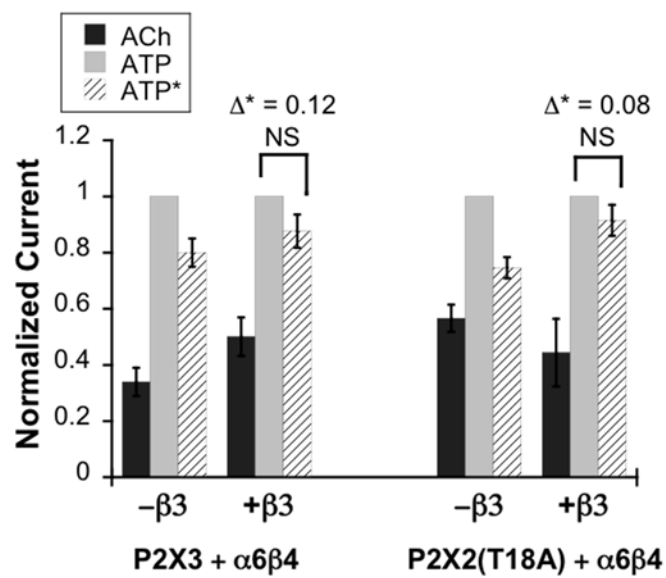

c.

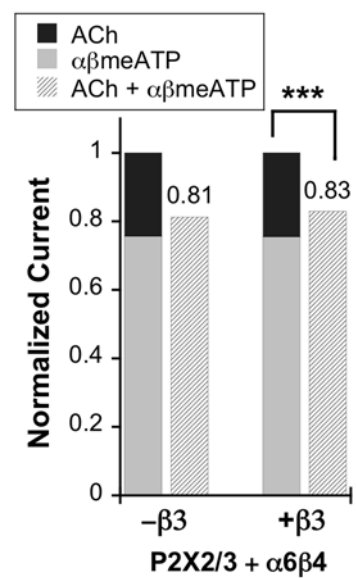

Supplemental Figure 7

a.

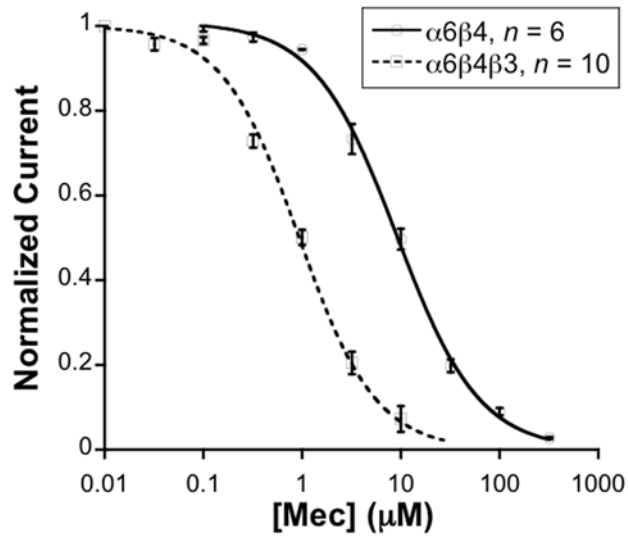

b.  $\alpha 6\beta 4$

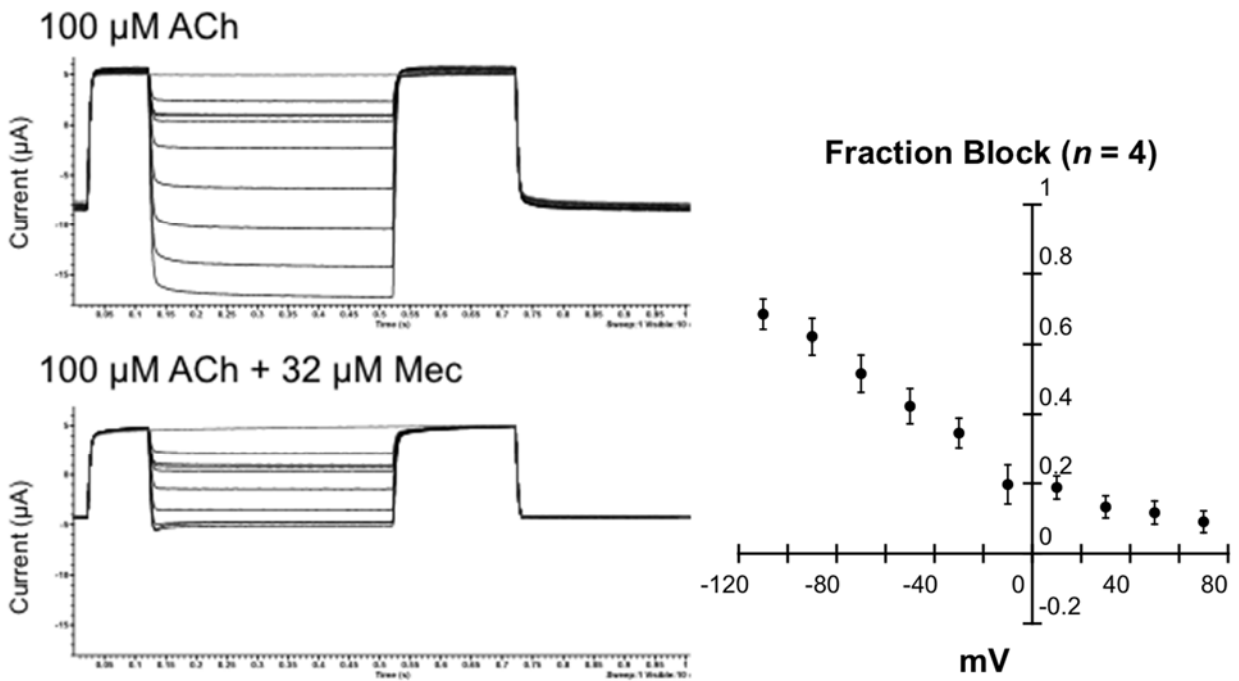

7c.  $\alpha 6\beta 4\beta 3$

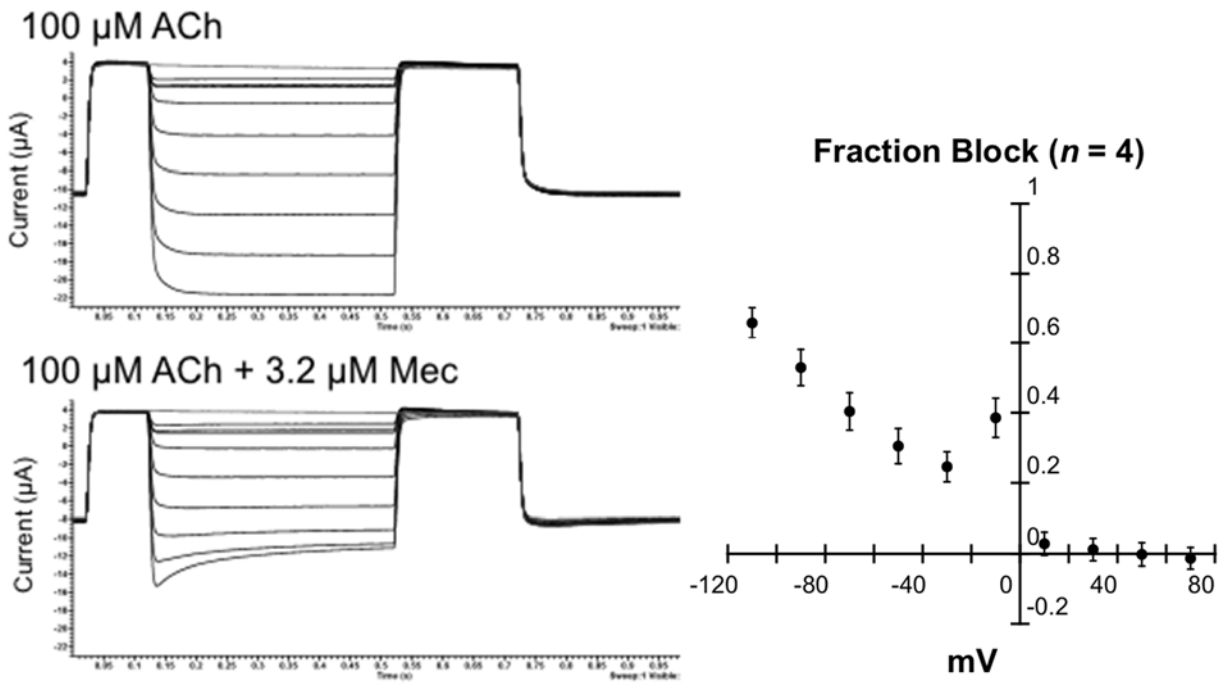

Supplemental Figure 8

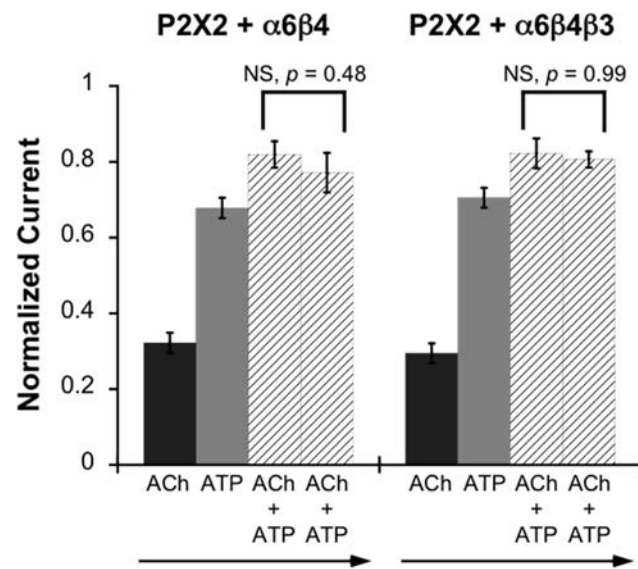

Supplement: 93179_2014-06-15_supplementary_info.pdf [file 93179_2014-06-15_supplementary_info.pdf]
